# Supplementary material for: Emergence of novel SARS-CoV-2 variants keeps slowing down
Source: Research Square preprint supplement (doi:10.21203/rs.3.rs-8761051/v1), 2026-02-06
Supplement: Supplementary file 1 [file 2a69e98b219e7626f38a126e.docx]

**Table 1 Epidemic time periods of SARS-CoV-2 serotypes.**

|  | TPdura (week)a | TPpeak (week) | TPalter (week) |
| --- | --- | --- | --- |
| Serotype I | 111b | NA | 98 |
|  | (107,118.25) | NA | (96.5,101) |
| Serotype II | 34 | 8 | 14 |
|  | (30,46) | (6,8.5) | (12,16) |
| Serotype III | 64 | 16 | 26 |
|  | (58,74) | (16,18) | (24,26) |
| Serotype IV | 72 | 22 | 44 |
|  | (60,82) | (18,28) | (42,52) |
| Serotype V | NA | 45 | 64 |
|  | NA | (36.5,48.5) | (62,68) |
| Serotype VI | NA | 26* | NA |
|  | NA | NA | NA |

a The duration of the time period of epidemic (TPdura), the peak time period of epidemic (TPpeak), the alternation time period of epidemic (TPalter). "NA" represents the data were unavailable. The definitions of the TPdura, TPpeak and TPalter were described in the Methods.

b The medians TPdura, TPpeak and TPalter were shown in the table with interquartile ranges in the brackets. "*" indicates that there is a data for only one country. The specific data were described in the Supplementary material (Supplement Table 2-4).
