# Supplementary material for: Emergence of novel SARS-CoV-2 variants keeps slowing down
Source: Research Square preprint supplement (doi:10.21203/rs.3.rs-8761051/v1), 2026-02-06
Supplement: Supplementary file 3 [file 55a159d86bb1a69c76e24137.docx]

**Table 2 Linear regression epidemic periods between SARS-CoV-2 serotypes.**

|  | TPduraa | TPpeak | TPalter | TPinter |
| --- | --- | --- | --- | --- |
| Coefficientb | 18.157***  （1.760） | 10.152***  （0.426） | 16.716***  （0.388） | 13.984***  （0.387） |
| Constant | 4.378  （5.094） | -13.696***  （1.436） | -21.724***  （1.348） | -26.018***  （1.320） |
| R2 | 0.513 | 0.773 | 0.915 | 0.883 |
| Adjusted R2 | 0.508 | 0.772 | 0.915 | 0.883 |
| F Statistic | 106.442***  （df=1; 101） | 569.156***  （df=1; 167） | 1856.198***  （df=1; 172） | 1308.476***  （df=1; 173） |

a The duration of the time period of epidemic (TPdura), the peak time period of epidemic (TPpeak), the alternation time period of epidemic (TPalter) and the interval between the epidemic onsets (TPinter). Considering the unique epidemic period for Serotype I, stringent control measures were implemented globally during the initial stages of outbreak before vaccination commenced. Therefore, Serotype I was not included in the comparison of the same epidemic period. Meanwhile, for TPdura, as there is no available termination point for Serotypes V and Ⅵ, we consider the duration of Serotypes II-Ⅳ as a benchmark; For TPpeak, to exclude the influence of single-country values for Serotype Ⅵ during its peak time, we select the peak times for Serotypes Ⅱ-V. For TPalter, since Serotype Ⅶ has not yet emerged, the prevailing alternation period of Serotypes Ⅱ-V was chosen. For TPinter, it can be used to predict the emerging time of a potential new serotype for SARS-CoV-2, which can be used to calculate such as TPinter I= Tonset Ⅱ - Tonset I. To eliminate the influence of Serotype I, we selected data from serotypes Ⅱ-Ⅵ to calculate TPinter Ⅱ-TPinter Ⅵ.

b TPdura =18.157X+4.378, TPpeak =10.152X-13.696, TPalter =16.716X-21.724, the X indicates the serotype of SARS-CoV-2. TPinter = 13.984X-26.018, the X represents the serotypes of the time difference between X and X+1. (Ex. When X=6, it means the time difference between serotypes Ⅵ and Ⅶ).

Note: **P*＜0.1；***P*＜0.05；****P*＜0.01.
